# Supplementary material
Source: publisher figshare collection journal article supplement (https://rs.figshare.com/ndownloader/files/17090147)
Supplement: Supplementary file 1 [file 17090147]

## Sheet: MixedMigration_Fobert et al
reefID	quality	LR	SR
1	L	0.111647	0.0313169				LR = local retention
2	L	0.0175462	0.023111				SR = self-recruitment
3	L	0.00424817	0.0168074
4	L	0.0006182	0.00335657
5	L	1.2745e-05	8.446e-06				quality
6	L	0.0799824	0.000732341				L = low
7	L	0.000212402	0.000901876				M = medium
8	L	0.000620744	0.00587236				H = high
9	L	0.000208103	0.00146331
10	L	0.0123425	0.0966335
11	L	0.0116	0.00112761
12	L	0.00382368	0.0177388
13	L	0.00349	0.0743697
14	L	0.00162314	0.0635447
15	L	0.0537145	0.019386
16	L	4.9008e-05	0.00983693
17	L	0.0204024	0.0206225
18	L	0.00637524	0.00323346
19	L	0.00224069	0.00353687
20	L	7.1795e-05	0.000121327
21	L	0.000661584	0.00012448
22	L	0.000233594	0.000229083
23	L	0.000135783	0.00047881
24	L	8.1092e-05	0.000162914
25	L	2.559e-06	2.962e-06
26	L	4.8814e-05	0.00208612
27	L	4.4112e-05	3.9025e-05
28	L	0.00020902	0.000123216
29	L	0.000160878	0.000117548
30	L	0.000231335	0.012478
31	L	0.00076233	0.00040737
32	L	0.000966796	0.0327308
33	L	0.000976255	0.0018308
34	L	2.0758e-05	1.5357e-05
1	M	0.14648	0.0410875
2	M	0.0568296	0.0748529
3	M	0.0071717	0.0283741
4	M	0.000120896	0.000656415
5	M	9.6906e-05	6.4217e-05
6	M	0.155641	0.00142509
7	M	0.000887751	0.00376947
8	M	0.00262948	0.0248755
9	M	0.00187409	0.013178
10	M	0.0115034	0.0900641
11	M	0.0650616	0.00632448
12	M	0.00013903	0.000644988
13	M	0.000291068	0.00620248
14	M	0.00605375	0.237
15	M	0.181211	0.0654006
16	M	0	0
17	M	0.0927091	0.0937094
18	M	0.129555	0.0657092
19	M	0.0250135	0.0394831
20	M	0.0137264	0.0231963
21	M	0.123225	0.0231853
22	M	0.064752	0.0635017
23	M	0.084099	0.296557
24	M	0.0100374	0.0201652
25	M	0.00024322	0.000281518
26	M	0.000183136	0.00782646
27	M	0.000684365	0.00060545
28	M	0.0359341	0.021183
29	M	0.00309505	0.00226145
30	M	0.00885442	0.477599
31	M	0.107973	0.0576981
32	M	0.00316086	0.107011
33	M	0.0375616	0.0704403
34	M	0.00035143	0.000259988
1	H	0.0922193	0.0258674
2	H	0.0225291	0.0296742
3	H	0.00104303	0.00412664
4	H	1.5982e-05	8.6774e-05
5	H	0	0
6	H	0.0796058	0.000728892
7	H	0.00184416	0.00783046
8	H	0.000481735	0.00455731
9	H	0.000306653	0.00215629
10	H	0.00575511	0.0450586
11	H	0.0821016	0.00798089
12	H	3.4247e-05	0.000158876
13	H	0.00409904	0.0873479
14	H	0.00310293	0.121478
15	H	0.0874676	0.0315679
16	H	0.000740741	0.148682
17	H	0.00930588	0.0094063
18	H	0.118073	0.0598854
19	H	0.00706494	0.0111518
20	H	0.00933794	0.0157802
21	H	0.0264452	0.00497577
22	H	0.0167367	0.0164135
23	H	0.0319581	0.112693
24	H	0.0391732	0.0786994
25	H	0.00656824	0.0076025
26	H	0.00086693	0.037049
27	H	0.00396573	0.00350844
28	H	0.051315	0.0302501
29	H	9.3147e-05	6.806e-05
30	H	0.000433269	0.0233701
31	H	0.107628	0.0575136
32	H	0.00126861	0.0429486
33	H	0.000801802	0.00150364
34	H	1.3972e-05	1.0337e-05
